# Supplementary material for: Claudin-2 promotes colorectal cancer liver metastasis and is a biomarker of the replacement type growth pattern
Source: PubMed Central journal article supplement (PMC8172859; doi:10.1038/s42003-021-02189-9), 2021-06-02
Supplement: 42003_2021_2189_MOESM1_ESM.pdf [file 42003_2021_2189_MOESM1_ESM.pdf]

Claudin-2 IHC: Primary CRC Tumors (HT-29)

Low Liver-Metastatic Burden

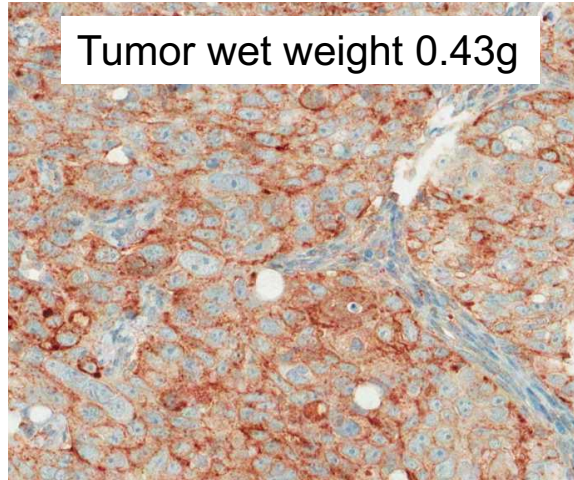

Medium Liver-Metastatic Burden

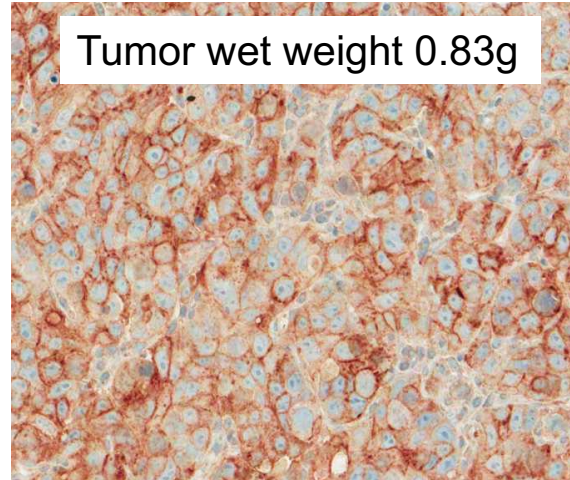

High Liver-Metastatic Burden

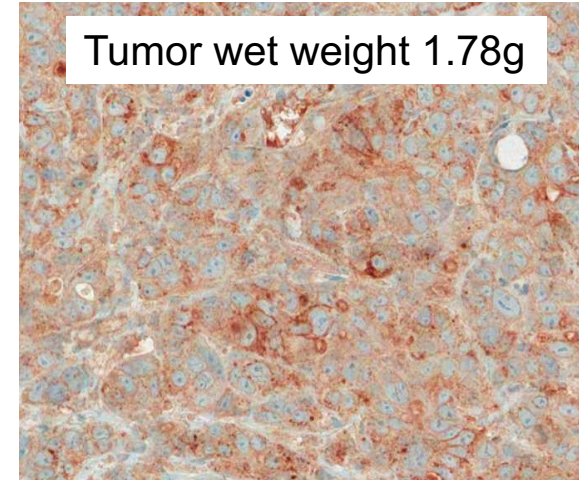

Tumor wet weight 0.39g

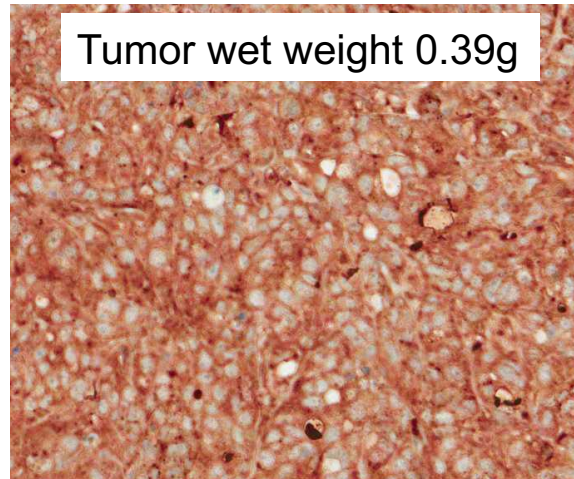

Tumor wet weight 0.76g

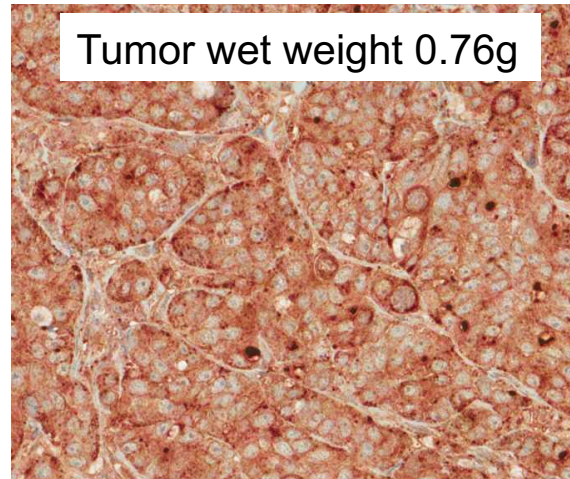

Tumor wet weight 1.89g

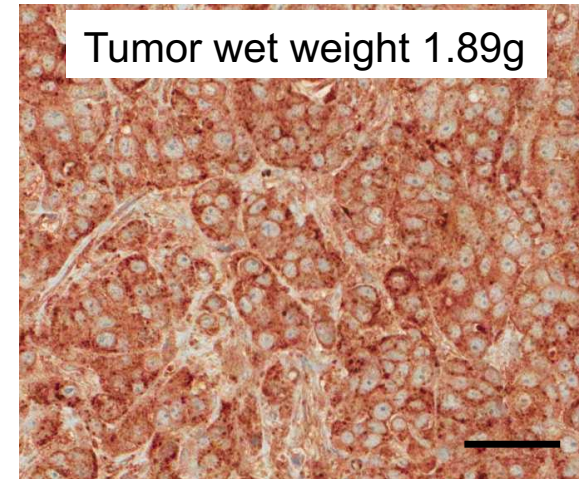

**Supplementary Fig. 1: Claudin-2 expression in HT-29-derived primary CRC tumors is not correlated with the degree of spontaneous liver metastasis.** Representative images of Claudin-2 IHC performed on primary CRC tumors (intra-caecal injection) shown in Figure 1d of the manuscript. Scale bar = 50 mm and applies to all panels.

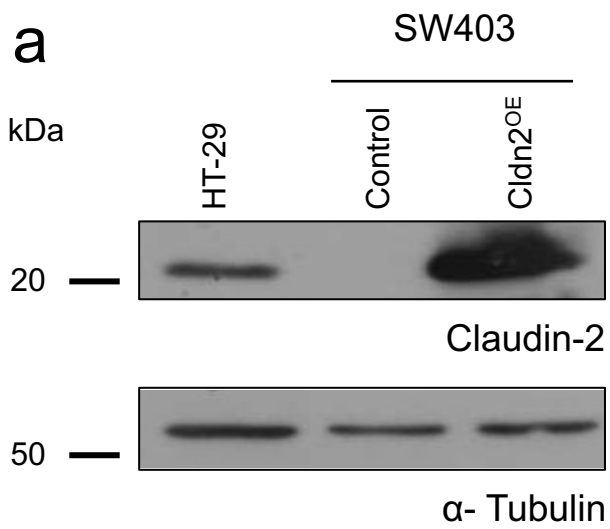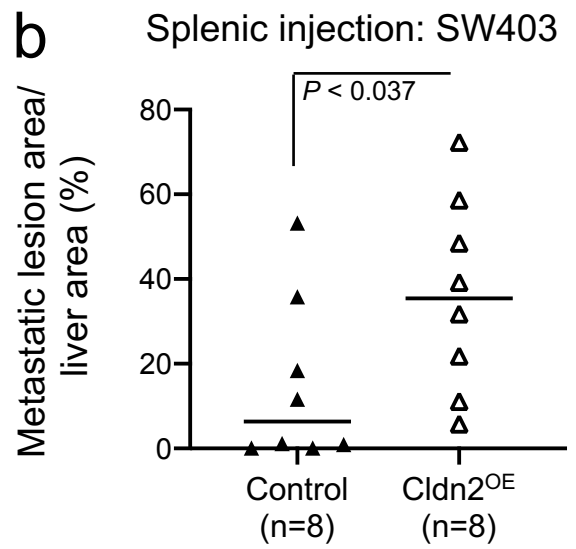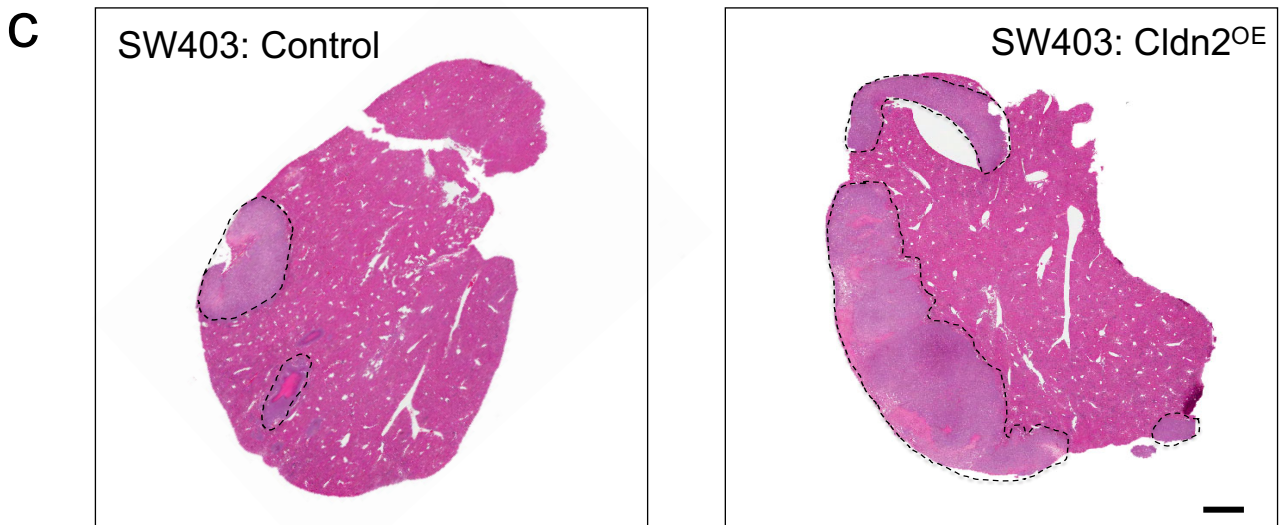

Tabariès *et al.*, Supplementary Figure 2

**Supplementary Fig. 2: Claudin-2 expression promotes efficient colorectal cancer liver metastasis.** **a** Immunoblot analysis of Claudin-2 expression in parental SW403 colorectal cancer cells (Ctrl) or SW403 cells engineered to express exogenous claudin-2 (cldn2<sup>OE</sup>). A whole cell lysate from HT-29 cells serves as a positive control. As a loading control, whole cell lysates were blotted for  $\alpha$ -Tubulin. **b** Quantification of the metastatic burden (tumor area/tissue area) within the cardiac liver lobe following splenic injection. **c** Representative H&E images of the cardiac liver lobe are shown for mice injected with the indicated cell populations. Dotted lines circumscribe colorectal cancer metastatic lesions within the liver. Scale bar = 2 mm and applies to both panels.

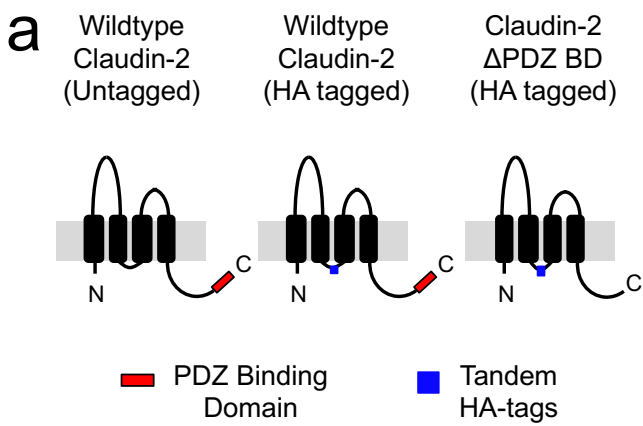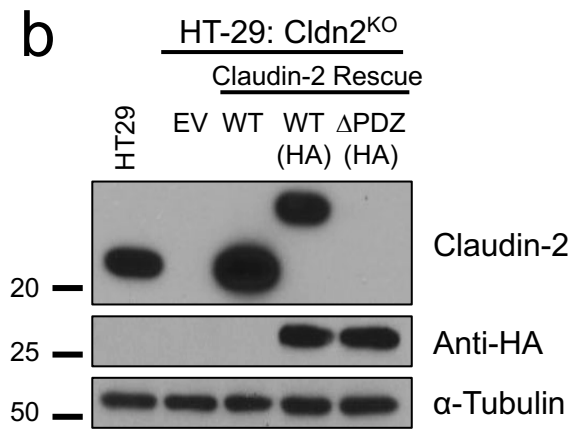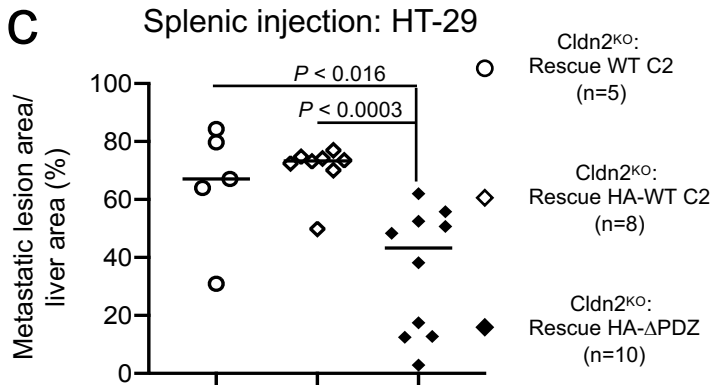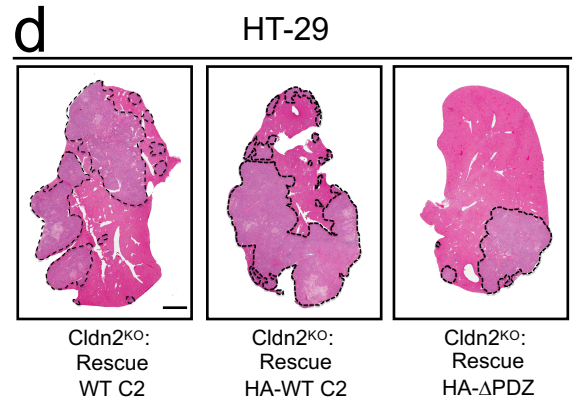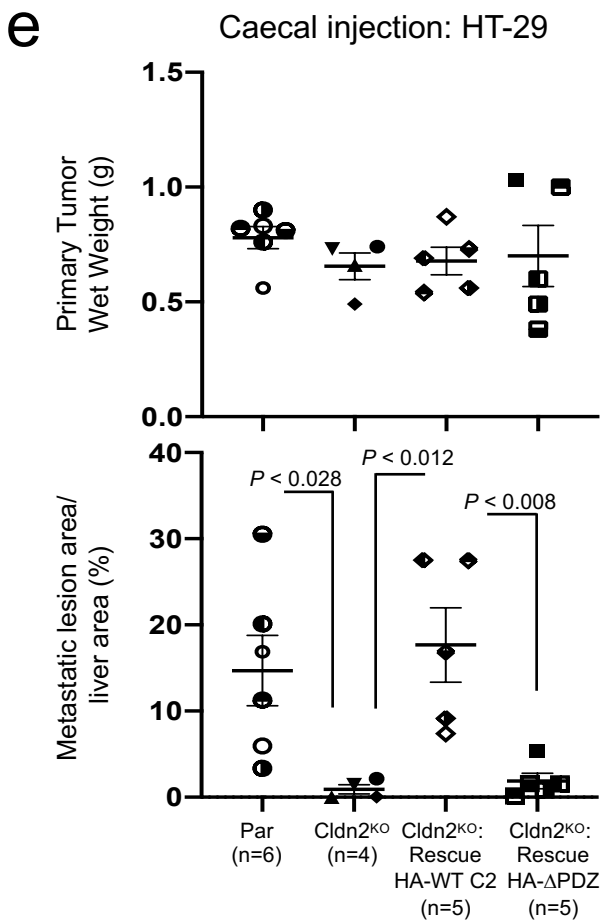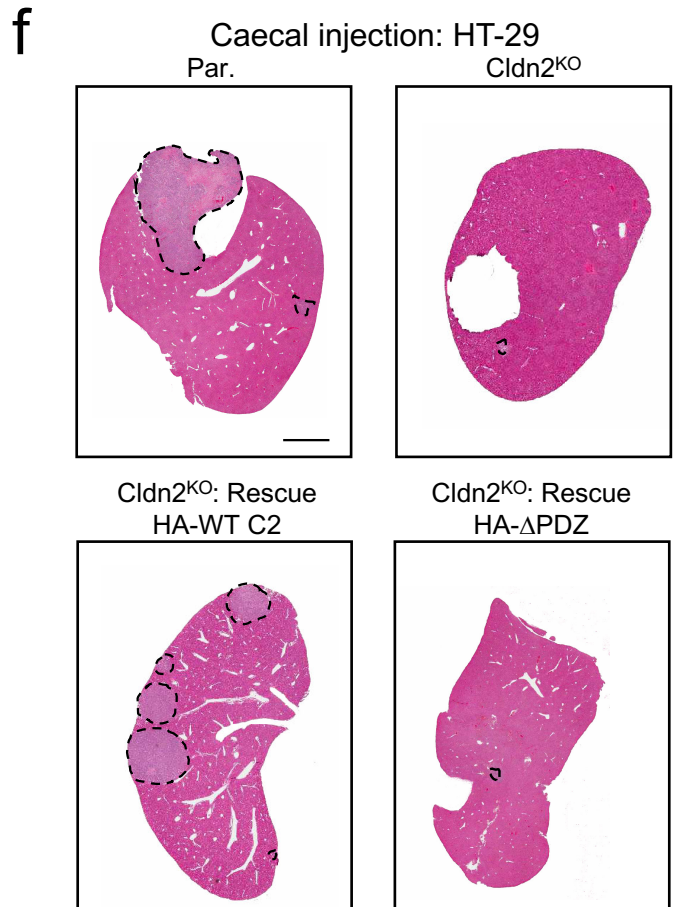

**Supplementary Fig. 3: The Claudin-2 PDZ-binding motif contributes to efficient colorectal cancer liver metastasis.** **a** Schematic of Claudin-2 indicating the presence of the H-Influenza hemagglutinin (HA) tag in the cytoplasmic loop of wild-type and  $\Delta$ PDZ BD Claudin-2 mutant. **b** Claudin-2 expression in the indicated HT-29 derived cell populations was analyzed by immunoblotting with anti-Claudin-2 and anti-HA antibodies.  $\alpha$ -Tubulin served as a loading control. **c** Liver-metastatic burden (lesion area/tissue area) was analyzed following splenic injection of the indicated cell lines. **d** Representative H&E images of the cardiac liver lobe from mice injected with the indicated cell populations are shown. Scale bar represents 2 mm and applies to all panels. **e** Quantification of the primary tumor burden (wet weight) and metastatic burden (lesion area/tissue area) within the cardiac liver lobe following caecal injection. **f** Representative H&E images of the cardiac liver lobe are shown for mice injected (caecal) with the indicated cell populations. Scale bar, 2 mm and applies to all panels. Data are presented as the mean  $\pm$  SE.

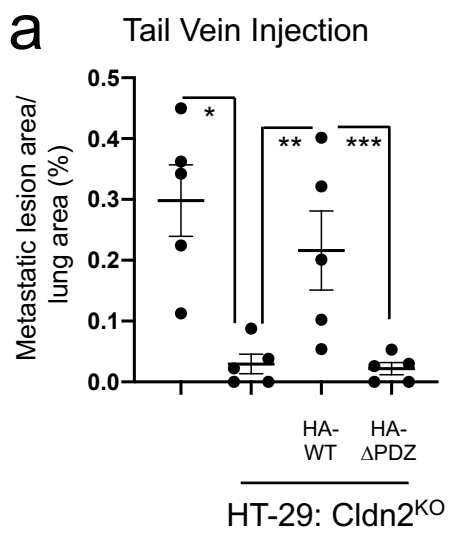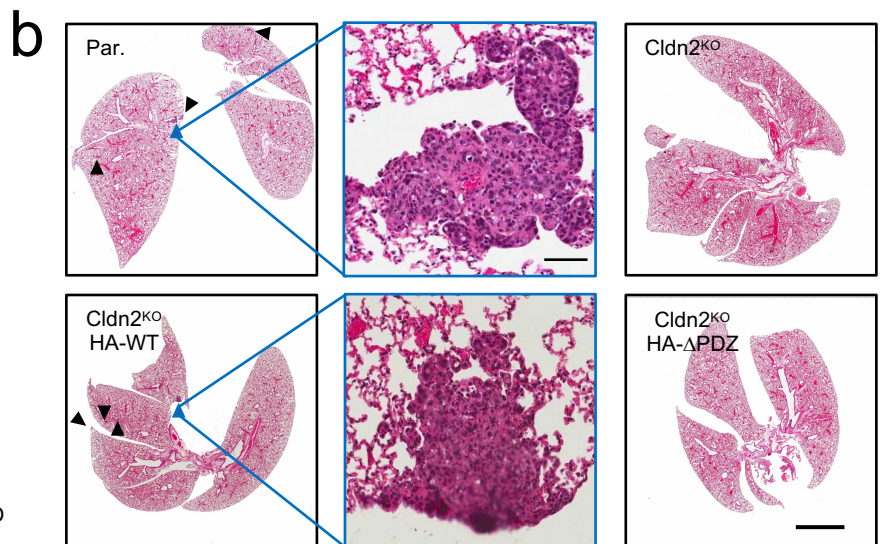

Tabariès *et al.*, Supplementary Figure 4

**Supplementary Fig. 4: Claudin-2 mediates efficient colorectal cancer lung metastasis.**

**a** Lung-metastatic burden (tumor area/tissue area) was analyzed following tail vein injection of the indicated cell lines (\*,  $P = 0.0022$ ; \*\*,  $P = 0.024$ ; \*\*\*,  $P = 0.0185$ ).

**b** Representative images of the lungs for each cell population are shown. Scale bar represents 2 mm and applies to all panels. Scale bar within the inset represents 50  $\mu\text{m}$  and applies to all panels. Data are presented as the mean  $\pm$  SE.



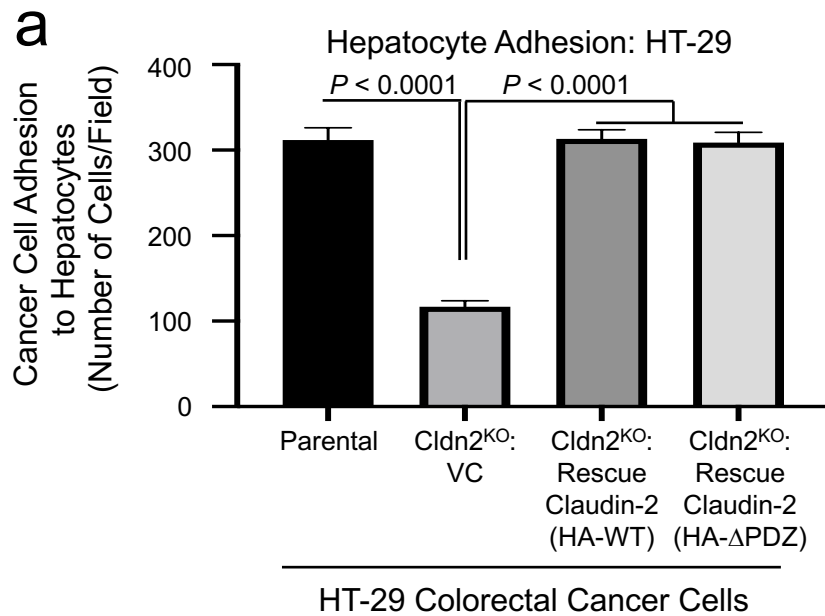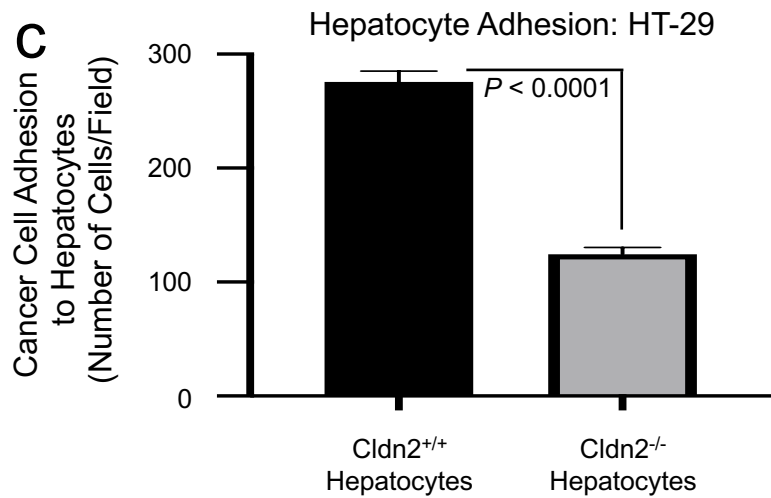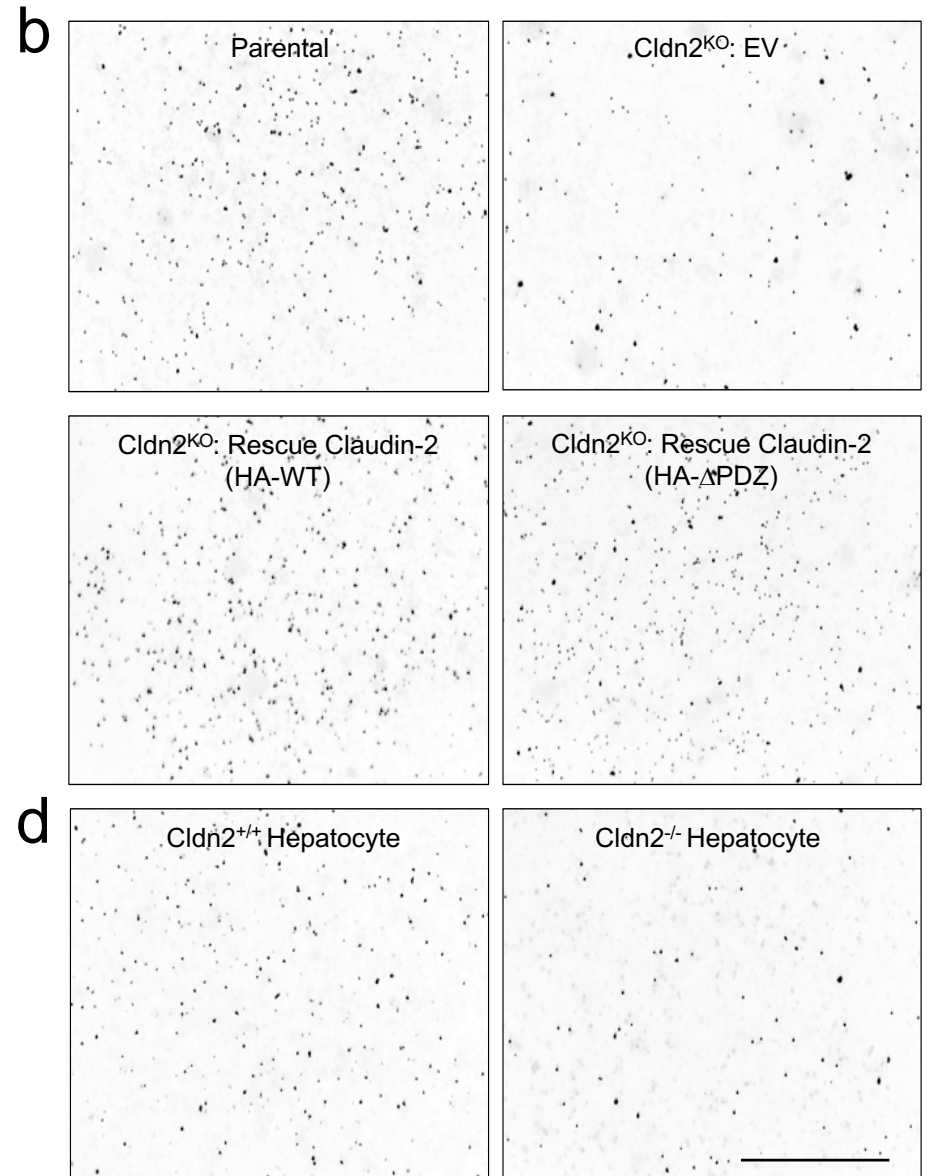

**Supplementary Fig. 5: Claudin-2 functions to promote colorectal cancer cell adhesion to hepatocytes.** **a** The indicated colorectal cancer cells were plated onto primary hepatocyte monolayers and adhesion was quantified after 1 h. Claudin-2 deficiency in HT-29 cells resulted in statistically significant decreases in hepatocyte adhesion compared to parental cells. The phenotype was rescued upon expression of either the wild-type Claudin-2 or the  $\Delta$ PDZ BD Claudin-2 mutant. **b** Representative images of each cancer cell population following adhesion to primary hepatocyte monolayers are shown. **c** Human HT-29 colorectal cancer cells (expressing Claudin-2) were analyzed for their abilities to adhere to either Claudin-2 proficient or deficient primary hepatocyte monolayers. Loss of Claudin-2 expression in primary hepatocytes resulted in statistically significant decreases in hepatocyte adhesion compared to control hepatocytes. **d** Representative images are shown following cancer cell adhesion to a monolayer of primary hepatocytes. The scale bar (right) represents 200  $\mu$ m and apply to all panels in **b** and **d**. VC: vector control. Data are presented as the mean  $\pm$  SE.

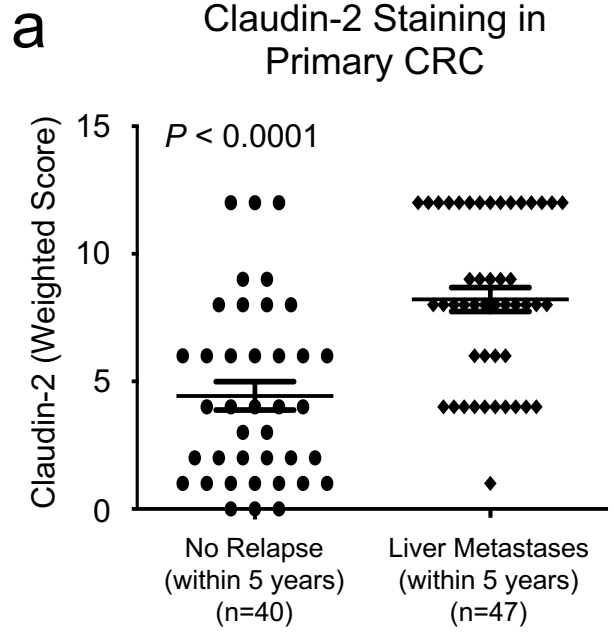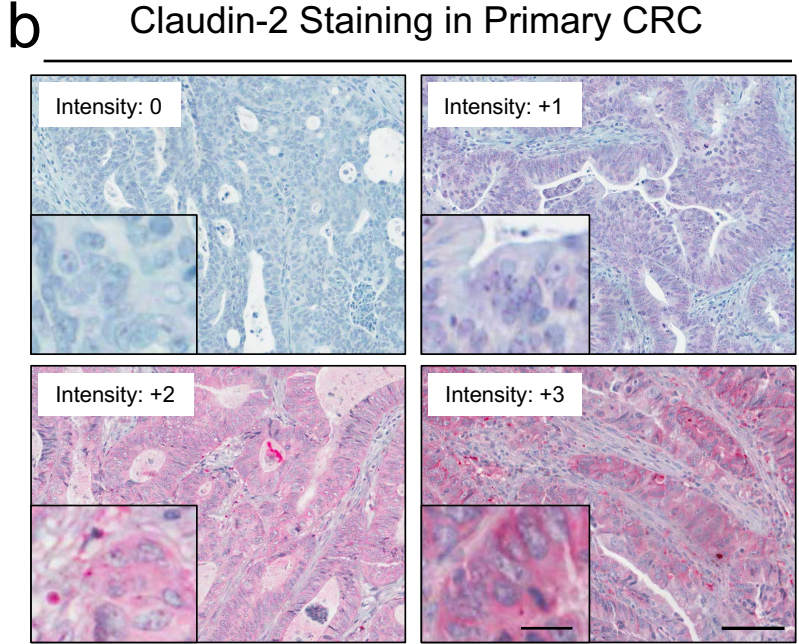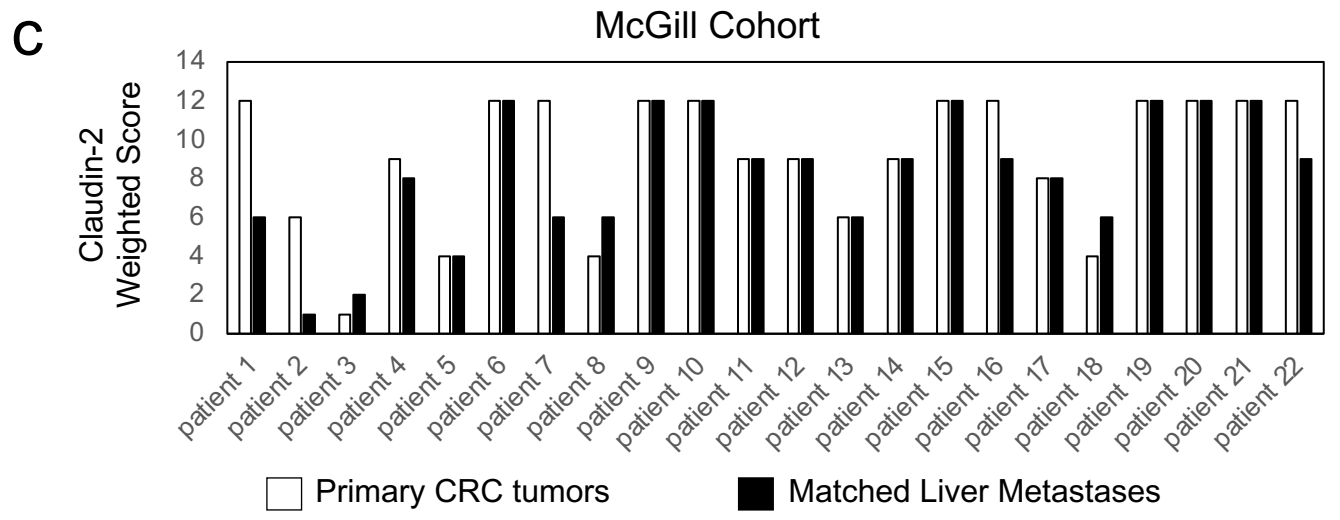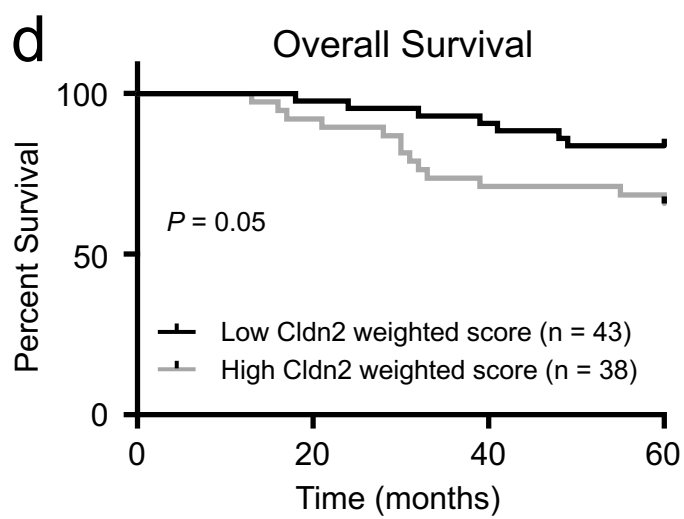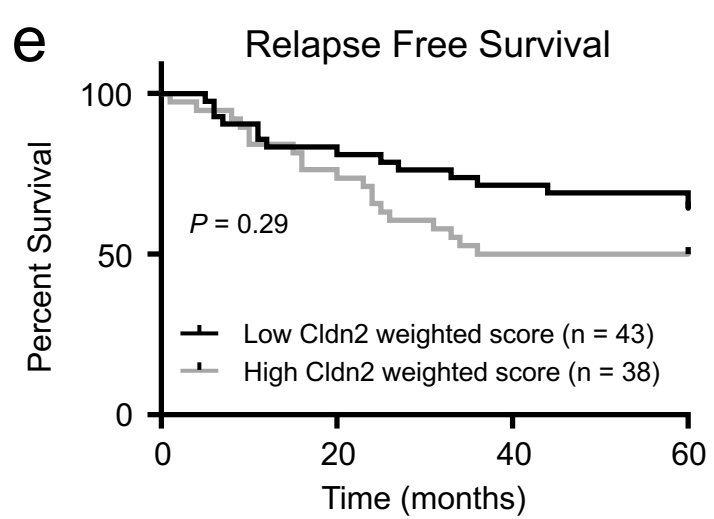

**Supplementary Fig. 6: High Claudin-2 expression in primary colorectal cancers is associated with the rapid formation of liver metastases.** **a** Quantification of Claudin-2 immunohistochemical staining of paraffin embedded sections from primary colorectal cancers (CRC). A total of 40 primary CRC tumors from patients with no known liver-specific relapse within 5 years and 47 primary CRC samples patients with relapse to the liver within 5 years were analyzed. Scoring of Claudin-2 staining (percentage positivity and intensity) was performed by two independent pathologists (AO, GA). **b** Representative images of Claudin-2 IHC from each category (0, +1, +2, +3) are shown. Scale bar = 100  $\mu\text{m}$  and applies to all panels. Scale bar in inset = 20  $\mu\text{m}$  and applies to all panels **c** Paraffin embedded sections from primary colorectal cancers and their matched liver metastases from 22 patients were subjected to immunohistochemical staining with anti-Claudin-2 antibodies. A weighted score for Claudin-2 staining (percentage positivity and intensity) in each sample was provided by two independent pathologists (AO and GA). **d** High Claudin-2 weighted score (equal or higher than 8) in primary tumors from colorectal cancer patients is significantly associated with poor overall survival. **e** High Claudin-2 weighted score in primary tumors from colorectal cancer patients is associated with poor relapse-free survival. Data are presented as the mean  $\pm$  SE.

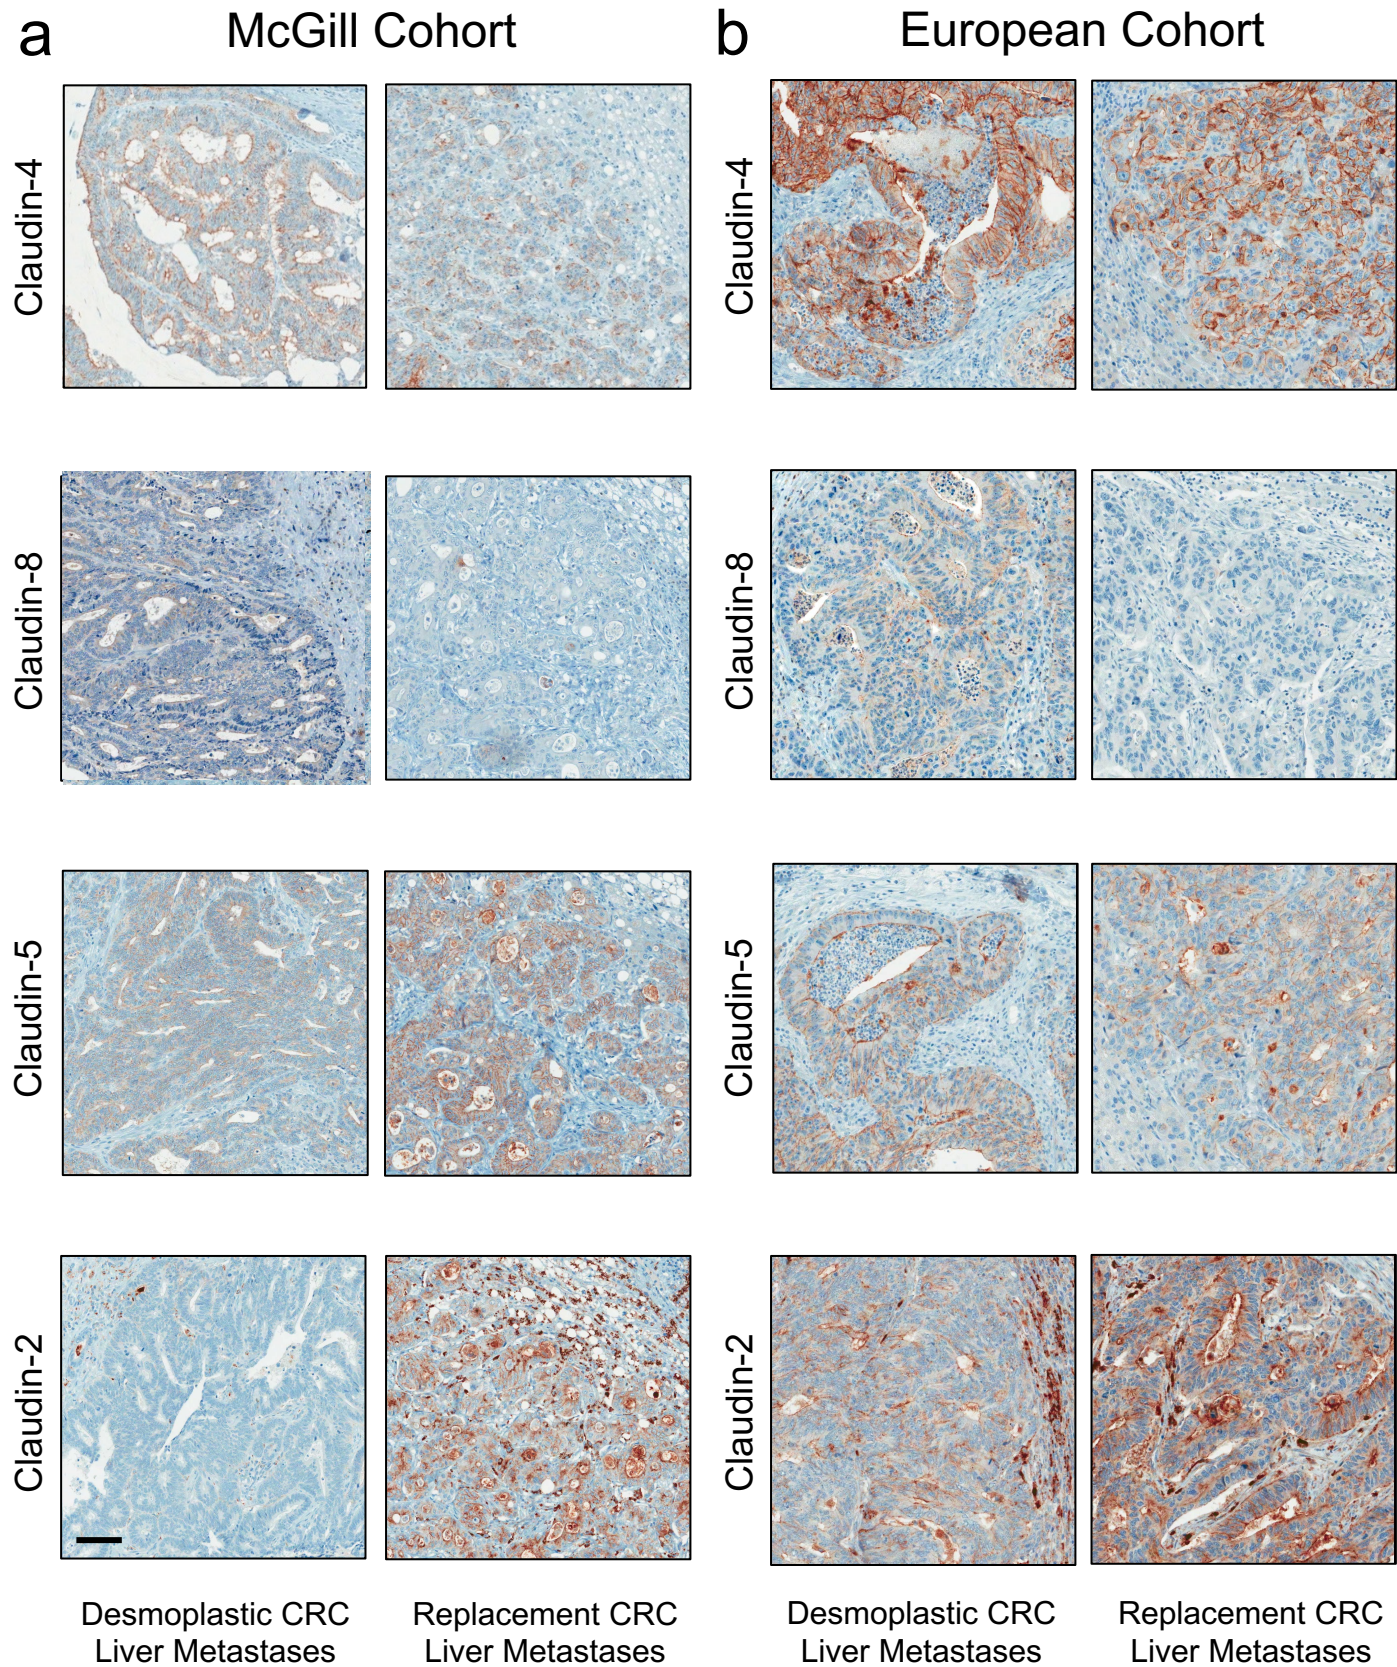

**Supplementary Fig. 7: Claudin-2 protein is enriched in the replacement type lesions while higher Claudin-8 expression is associated with desmoplastic type liver metastases. a, b** Representative IHC images from Claudin-4, Claudin-8, Claudin-5 or Claudin-2 staining are shown for both the McGill (**a**) and European (**b**) cohorts. Scale bar = 50  $\mu\text{m}$  and applies to all panels. This figure is associated with Figure 4.

H&E Stain

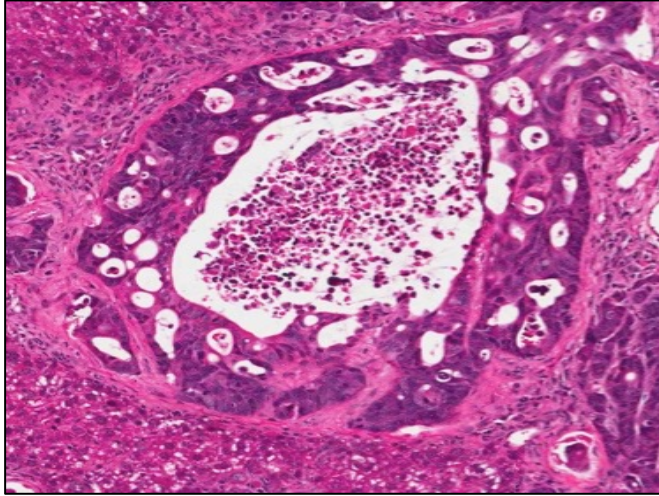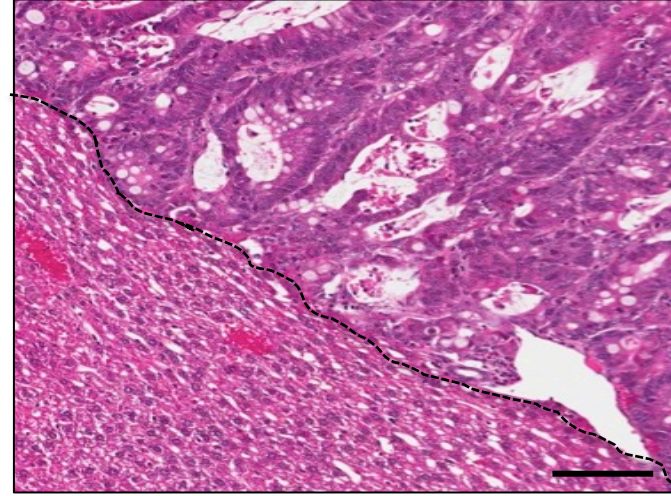

CK20 IHC

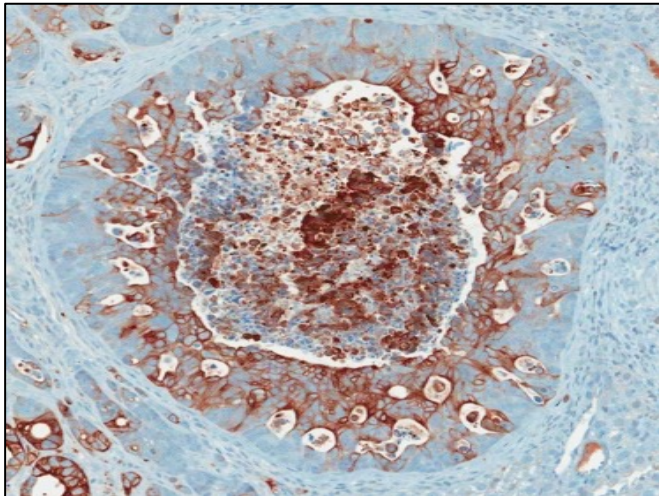

DHGP PDX lesion

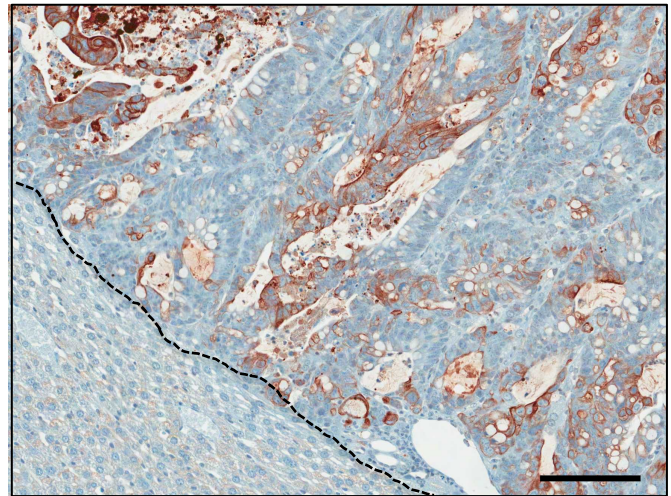

RHGP PDX lesion

**Supplementary Fig. 8: CK20 is expressed in PDXs models of both desmoplastic and replacement type colorectal cancer liver metastases.** Paraffin embedded sections from DHGP or RHGP PDXs lesions were stained with H&E (*upper panels*) or subjected to immunohistochemical staining with anti-human specific CK20 antibody (*lower panels*). Scale bar = 50  $\mu$ m and applies to all panels.



**a**

## CRCLM PDXs – Subcutaneous tumors

| Desmoplastic |      |      |      | Mixed |      |       |       | Replacement |       |        |        |       |       |
|--------------|------|------|------|-------|------|-------|-------|-------------|-------|--------|--------|-------|-------|
| HT-29        | PDX3 | PDX5 | PDX6 | PDX9  | PDX8 | PDX28 | PDX37 | PDX1        | PDX23 | PDX24A | PDX24B | PDX30 | PDX32 |

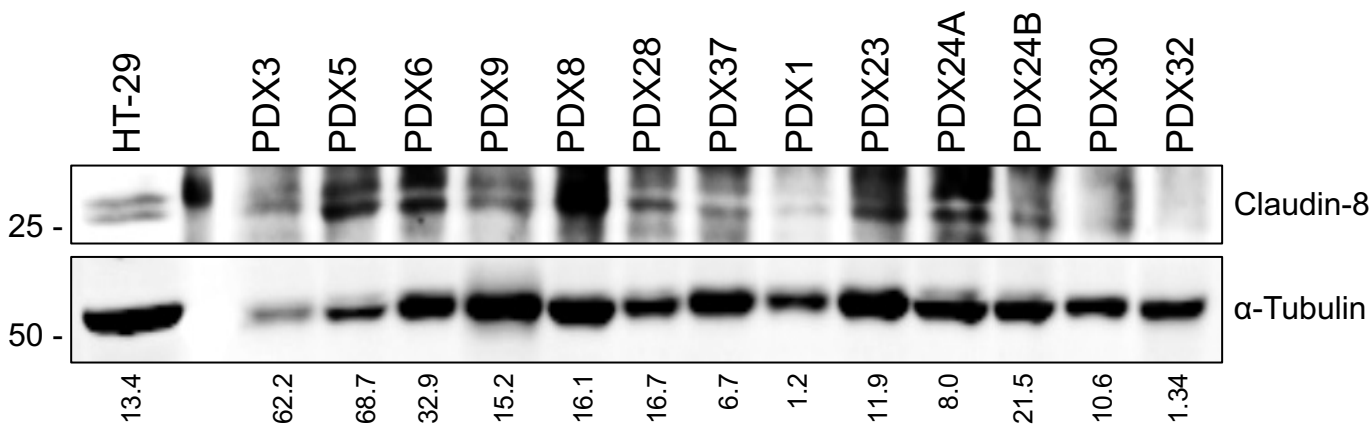**b**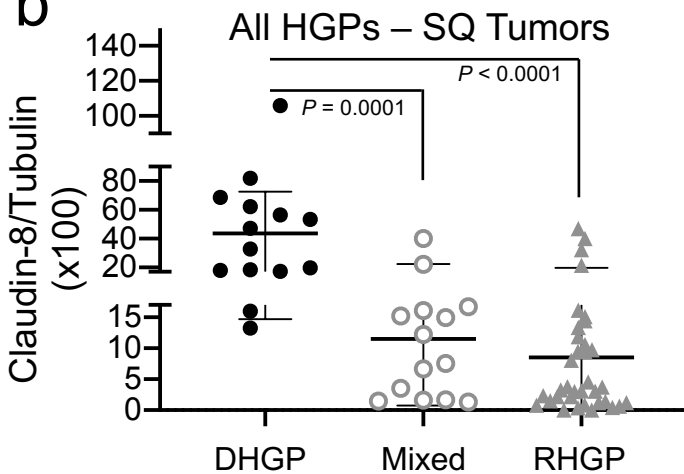**c**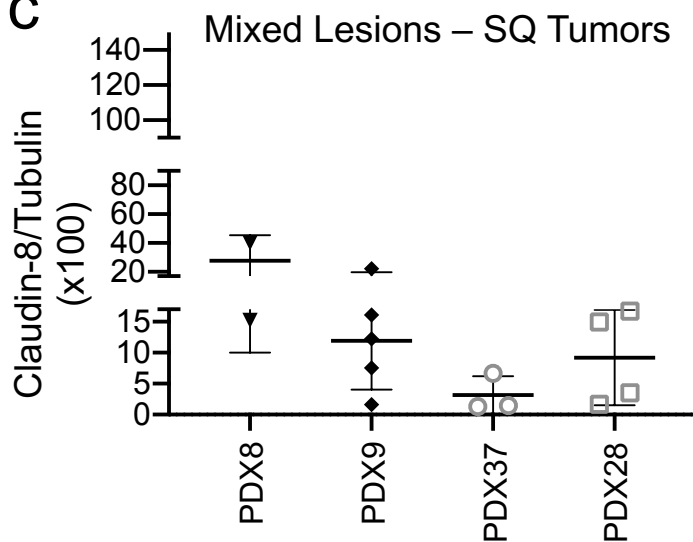

**Supplementary Fig. 9: PDX-derived models for both replacement and desmoplastic type liver metastases.** **a** Representative immunoblot analysis of Claudin-8 expression in subcutaneous tumor lysates from PDXs. As a loading control, total cell lysates were blotted for  $\alpha$ -Tubulin. **b** Claudin-8 expression is elevated in sub-cutaneous tumors derived from desmoplastic type metastases. **c** Detailed assessment of the Claudin-8/Tubulin ratio in the mixed lesions. The ratio of Claudin-8 to  $\alpha$ -Tubulin was measured using an Odyssey infrared imaging system and are indicated in each panel (**a-c**). Data are presented as the mean  $\pm$  SE.

a

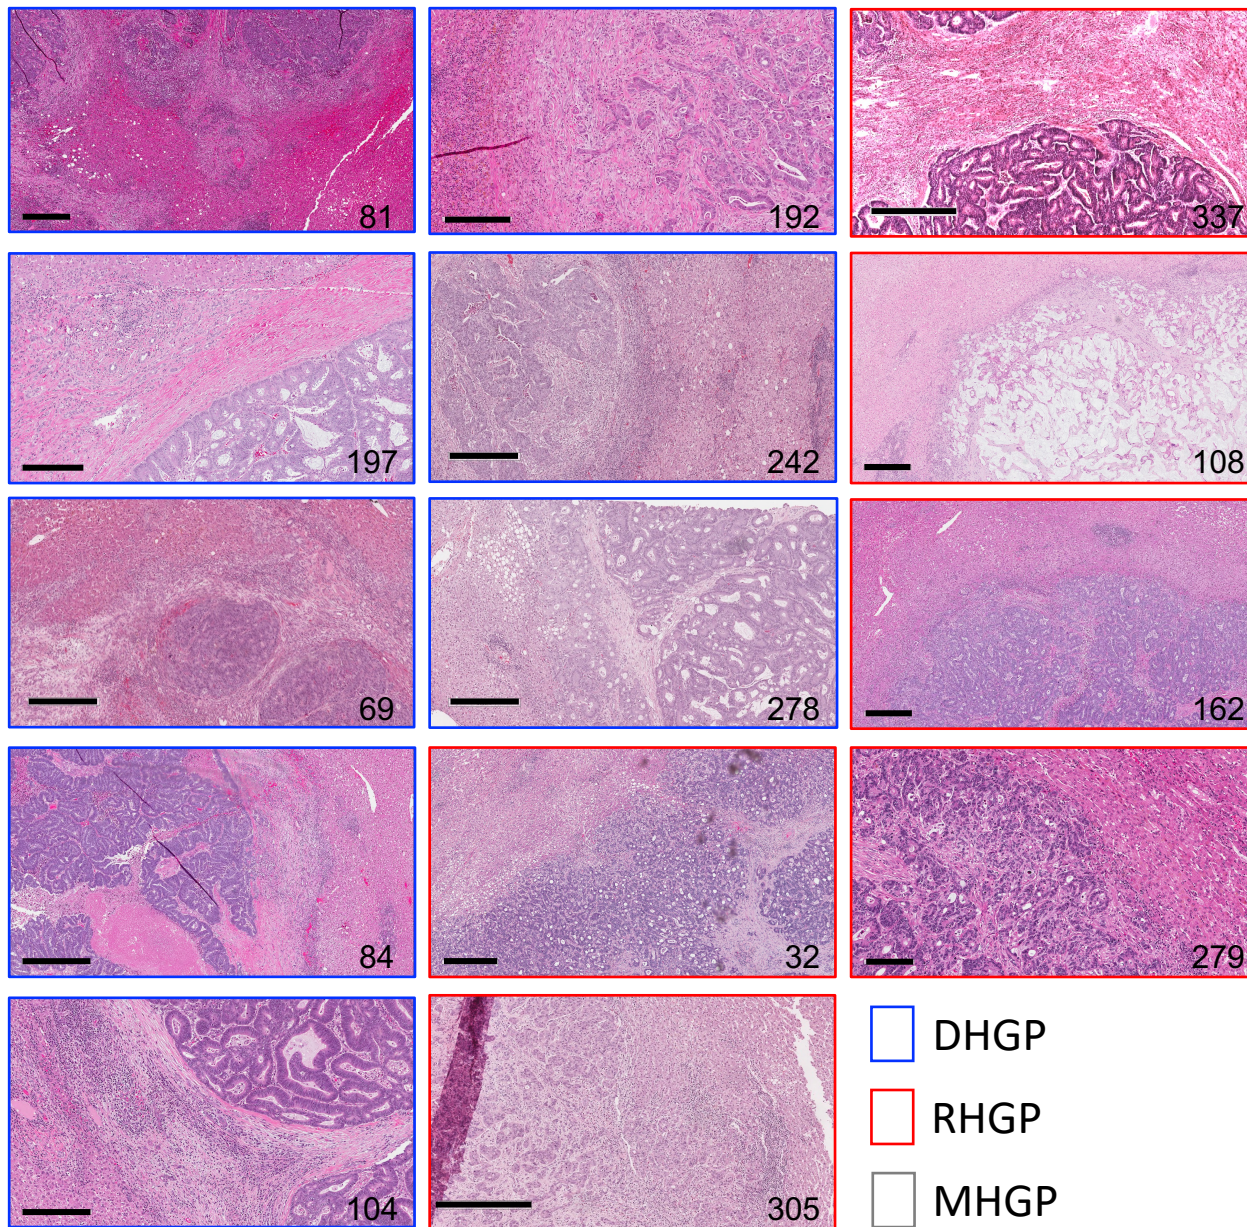

b

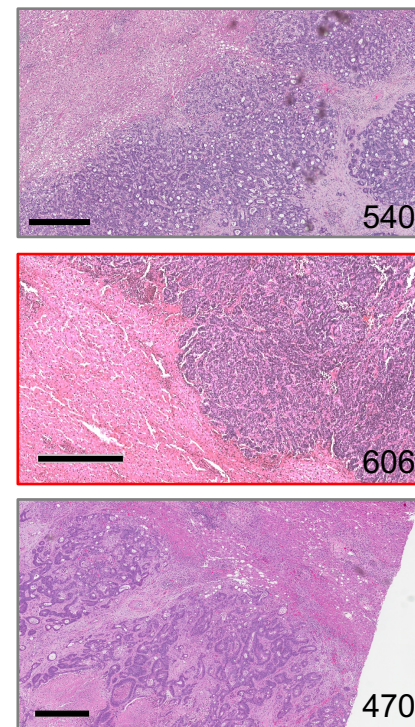

- DHGP
- RHGP
- MHGP

**Supplementary Fig. 10: Histopathological growth patterns of colorectal cancer liver metastases from patients used for EV isolation.** **a, b** DHGP or RHGP lesions paraffin embedded sections from patient from whom concentrated EVs samples were used in Figure 6b, c (**a**) or Figure 6 d, e (**b**) were stained with H&E. blue box outline = DHGP, red box outline = RHGP and grey box outline = mixed lesion (MHGP). Scale bar = 500  $\mu\text{m}$  and applies to all panels.

Supplementary Table 1: Significance levels for CLDN2 expression in association with cancer gene mutations

|    | Gene          | #Mutated Samples | log2(M/WT)   | SE           | P-Value           |
|----|---------------|------------------|--------------|--------------|-------------------|
| 1  | APC           | 239              | -0.203       | 0.288        | 0.481             |
| 2  | TP53          | 196              | -0.180       | 0.278        | 0.516             |
| 3  | TTN           | 160              | -0.144       | 0.281        | 0.608             |
| 4  | <b>KRAS</b>   | <b>139</b>       | <b>1.388</b> | <b>0.279</b> | <b>&lt;0.0001</b> |
| 5  | <b>PIK3CA</b> | <b>104</b>       | <b>1.420</b> | <b>0.302</b> | <b>&lt;0.0001</b> |
| 6  | MUC16         | 95               | 0.093        | 0.320        | 0.772             |
| 7  | SYNE1         | 90               | 0.017        | 0.326        | 0.958             |
| 8  | FAT4          | 78               | 0.244        | 0.343        | 0.477             |
| 9  | OBSCN         | 67               | 0.605        | 0.362        | 0.096             |
| 10 | ZFHX4         | 67               | -0.088       | 0.363        | 0.809             |
| 11 | DNAH5         | 66               | -0.604       | 0.364        | 0.098             |
| 12 | RYR2          | 66               | 0.216        | 0.365        | 0.555             |
| 13 | CSMD1         | 57               | 0.350        | 0.387        | 0.366             |
| 14 | FLG           | 57               | 0.206        | 0.387        | 0.595             |
| 15 | LRP1B         | 56               | -0.144       | 0.390        | 0.712             |
| 16 | PCLO          | 56               | 0.638        | 0.389        | 0.102             |
| 17 | FAT3          | 55               | 0.407        | 0.393        | 0.301             |
| 18 | CSMD3         | 54               | -0.086       | 0.396        | 0.829             |
| 19 | DNAH11        | 54               | 0.176        | 0.396        | 0.657             |
| 20 | USH2A         | 53               | 0.194        | 0.399        | 0.627             |
| 21 | FBXW7         | 52               | -0.052       | 0.403        | 0.898             |
| 22 | ABCA13        | 51               | -0.310       | 0.406        | 0.446             |
| 23 | RYR1          | 51               | -0.166       | 0.406        | 0.682             |
| 24 | HYDIN         | 50               | -0.117       | 0.409        | 0.775             |
| 25 | RYR3          | 50               | -0.624       | 0.408        | 0.127             |
| 26 | SDK1          | 50               | -0.111       | 0.409        | 0.786             |

Supplementary Table 2: Patient-Derived Xenograft Models

| RHGP <sup>a</sup> donors  |        |     | Donor Patient HGP <sup>c</sup> |         |         | Sub-cutaneous transplantation | Intra-hepatic Transplantation |                  |
|---------------------------|--------|-----|--------------------------------|---------|---------|-------------------------------|-------------------------------|------------------|
| PDX#                      | Gender | Age | Desmo.                         | Replac. | Pushing |                               | PDX HGP                       |                  |
| PDX1                      | Male   | 39  | 0                              | 100     | 0       | Succeed <sup>d</sup>          | Failed <sup>e</sup>           | N/A <sup>f</sup> |
| PDX11                     | Male   | 60  | 0                              | 100     | 0       | Not tested                    | Not tested                    | N/A              |
| PDX23                     | Female | 66  | 0                              | 100     | 0       | Succeed                       | Succeed                       | RHGP             |
| PDX24A                    | Male   | 54  | 10                             | 90      | 0       | Succeed                       | Succeed                       | RHGP             |
| PDX24B                    | Male   | 54  | 0                              | 100     | 0       | Succeed                       | Succeed                       | RHGP             |
| PDX30                     | Female | 85  | 0                              | 100     | 0       | Succeed                       | Succeed                       | RHGP             |
| PDX32                     | Male   | 42  | 0                              | 100     | 0       | Succeed                       | Not tested                    | N/A              |
| PDX33                     | Male   | 79  | 0                              | 100     | 0       | Succeed                       | Succeed                       | RHGP             |
| PDX36                     | Male   | 42  | 0                              | 100     | 0       | Succeed                       | Failed                        | N/A              |
| PDX37                     | Male   | 73  | 0                              | 75      | 25      | Succeed                       | Succeed                       | RHGP             |
| PDX39                     | Male   | 64  | 5                              | 80      | 15      | Failed                        | Failed                        | N/A              |
| PDX41                     | Female | 48  | 0                              | 100     | 0       | Succeed                       | Succeed                       | RHGP             |
| PDX42                     | Female | 63  | 5                              | 90      | 5       | Succeed                       | Not tested                    | N/A              |
| PDX62                     | Male   | 77  | 5                              | 95      | 0       | Failed                        | Not tested                    | N/A              |
| PDX67                     | Female | 73  | 0                              | 100     | 0       | Not tested                    | Not tested                    | N/A              |
| PDX68                     | Female | 67  | 5                              | 95      | 0       | Succeed                       | Succeed                       | RHGP             |
| success rate <sup>g</sup> |        |     |                                |         |         | 12/14 (86%)                   | 8/11(73%)                     |                  |
| DHGP <sup>b</sup> donors  |        |     | Donor Patient HGP              |         |         | Sub-cutaneous transplantation | Intra-hepatic Transplantation |                  |
| PDX#                      | Gender | Age | Desmo.                         | Replac. | Pushing |                               | PDX HGP                       |                  |
| PDX3                      | Male   | 59  | 95                             | 5       | 0       | Succeed                       | Succeed                       | DHGP             |
| PDX5                      | Male   | 58  | 95                             | 5       | 0       | Succeed                       | Succeed                       | DHGP             |
| PDX6                      | Male   | 60  | 95                             | 5       | 0       | Succeed                       | Succeed                       | DHGP             |
| PDX10                     | Male   | 68  | 100                            | 0       | 0       | Not tested                    | Not tested                    | N/A              |
| PDX14                     | Male   | 60  | 100                            | 0       | 0       | Failed                        | Failed                        | N/A              |
| PDX15                     | Female | 49  | 100                            | 0       | 0       | Failed                        | Failed                        | N/A              |
| PDX26B                    | Female | 66  | 80                             | 20      | 0       | Not tested                    | Not tested                    | N/A              |
| PDX35                     | Male   | 50  | 100                            | 0       | 0       | Succeed                       | Succeed                       | DHGP             |
| PDX44                     | Male   | 50  | 100                            | 0       | 0       | Succeed                       | Succeed                       | DHGP             |
| PDX48                     | Male   | 50  | 100                            | 0       | 0       | Succeed                       | Not tested                    | N/A              |
| PDX50                     | Female | 59  | 100                            | 0       | 0       | Failed                        | Not tested                    | N/A              |
| PDX53                     | Male   | 80  | 95                             | 5       | 0       | Succeed                       | Succeed                       | DHGP             |
| PDX54                     | Male   | 56  | 90                             | 10      | 0       | Failed                        | Succeed                       | DHGP             |
| PDX57                     | Male   | 71  | 95                             | 5       | 0       | Not tested                    | Not tested                    | N/A              |
| PDX64                     | Male   | 49  | 100                            | 0       | 0       | Not tested                    | Not tested                    | N/A              |
| PDX65                     | Male   | 60  | 75                             | 25      | 0       | Not tested                    | Not tested                    | N/A              |
| success rate              |        |     |                                |         |         | 7/11 (64%)                    | 7/9 (78%)                     |                  |
| Mixed HGP donors          |        |     | Donor Patient HGP              |         |         | Sub-cutaneous transplantation | Intra-hepatic Transplantation |                  |
| PDX#                      | Gender | Age | Desmo.                         | Replac. | Pushing |                               | PDX HGP                       |                  |
| PDX4                      | Female | 64  | 0                              | 35      | 65      | Succeed                       | Not tested                    | N/A              |
| PDX8                      | Male   | 66  | 50                             | 50      | 0       | Succeed                       | Succeed                       | DHGP             |
| PDX12                     | Male   | 39  | 10                             | 30      | 60      | Failed                        | Failed                        | N/A              |
| PDX28                     | Male   | 41  | 40                             | 55      | 5       | Succeed                       | Succeed                       | DHGP             |
| PDX43                     | Female | 63  | 50                             | 50      | 0       | Failed                        | Not tested                    | N/A              |
| PDX47                     | Male   | 43  | 30                             | 70      | 0       | Succeed                       | Succeed                       | RHGP/DHGP        |
| PDX66                     | Male   | 62  | 45                             | 35      | 20      | Succeed                       | Succeed                       | RHGP/DHGP        |
| PDX69                     | Male   | 76  | 65                             | 30      | 5       | Not tested                    | Not tested                    | N/A              |
| success rate              |        |     |                                |         |         | 5/7 (71%)                     | 4/5 (80%)                     |                  |
| Pushing HGP donors        |        |     | Donor Patient HGP              |         |         | Sub-cutaneous transplantation | Intra-hepatic Transplantation |                  |
| PDX#                      | Gender | Age | Desmo.                         | Replac. | Pushing |                               | PDX HGP                       |                  |
| PDX9                      | Male   | 74  | 0                              | 20      | 80      | Succeed                       | Not tested                    | N/A              |
| success rate              |        |     |                                |         |         | 1/1 (100%)                    | N/A                           |                  |
| CRCLM Biopsy donors       |        |     | Donor Patient HGP              |         |         | Sub-cutaneous transplantation | Intra-hepatic Transplantation |                  |
| PDX#                      | Gender | Age | Desmo.                         | Replac. | Pushing |                               | PDX HGP                       |                  |
| PDX38                     | Male   | 59  |                                | N/A     |         | Succeed                       | Succeed                       | RHGP             |
| PDX40                     | Female | 57  |                                | N/A     |         | Failed                        | Failed                        | N/A              |
| PDX45                     | Female | 76  |                                | N/A     |         | Succeed                       | Succeed                       | RHGP             |
| PDX46                     | Female | 44  |                                | N/A     |         | Succeed                       | Succeed                       | DHGP             |
| PDX49                     | Male   | 72  |                                | N/A     |         | Failed                        | Failed                        | N/A              |
| PDX51                     | Male   | 56  |                                | N/A     |         | Not tested                    | Not tested                    | N/A              |
| PDX56                     | Female | 50  |                                | N/A     |         | Not tested                    | Not tested                    | N/A              |
| PDX58                     | Male   | 44  |                                | N/A     |         | Not tested                    | Not tested                    | N/A              |
| success rate              |        |     |                                |         |         | 3/5 (60%)                     | 3/5 (60%)                     |                  |

<sup>a</sup>RHGP: Replacement Histological Growth Pattern

<sup>b</sup>DHGP: Desmoplastic Histological Growth Pattern

<sup>c</sup>HGP: Histological Growth Pattern

<sup>d</sup>succeed: transplanted for at least 3 successive passages

<sup>e</sup>failed: no tumor growth

<sup>f</sup>N/A: Not applicable

<sup>g</sup>success rate: percentage of successful transplantation over tested samples

Supplementary Table 3: Patient-Derived EV samples

| Patient ID | Gender | Age | Metastatic Sites | Liver Lesion size (cm) | Desmo. | Replac. | Pushing |
|------------|--------|-----|------------------|------------------------|--------|---------|---------|
| 81         | Male   | 33  | Liver            | 2.3                    | 90     | 10      | 0       |
| 197        | Male   | 77  | Liver            | 9                      | 100    | 0       | 0       |
| 79         | male   | 68  | Liver            | 1.2                    | 100    | 0       | 0       |
| 84         | Male   | 58  | Liver            | 1.4                    | 90     | 0       | 0       |
| 104        | Male   | 69  | Liver            | 5                      | 100    | 0       | 0       |
| 192        | Female | 72  | Liver            | 0.8                    | 95     | 5       | 0       |
| 242        | male   | 61  | Liver            | 1.2                    | 100    | 0       | 0       |
| 278        | Female | 78  | Liver, Lung      | 1                      | 100    | 0       | 0       |
| 204        | Male   | 50  | N/A              | N/A                    | NA     |         |         |
| 244        | Male   | 40  | N/A              | N/A                    | NA     |         |         |
| 32         | Male   | 57  | Liver, Lung      | 5.7                    | 0      | 100     | 0       |
| 305        | Female | 63  | Liver            | 5                      | 0      | 100     | 0       |
| 337        | Female | 66  | Liver            | 5.6                    | 0      | 100     | 0       |
| 108        | Female | 56  | Liver            | 9.7                    | 5      | 85      | 10      |
| 162        | Female | 59  | Liver            | 0.7                    | 0      | 100     | 0       |
| 279        | Male   | 75  | Liver            | 1.8                    | 10     | 90      | 0       |
| 540/540.1  | Male   | 72  | Liver            | N/A                    | 70*    | 30      | 0       |
| 606/606.2  | Female | 80  | Liver            | N/A                    | 0      | 100     | 0       |
| 464/464.2  | Female | 69  | Liver, Lung      | N/A                    | 0      | 100     | 0       |
| 466/466.3  | Female | 45  | Liver            | N/A                    | 50     | 50      | 0       |
| 470/470.2  | Male   | 50  | Liver, Lung      | N/A                    | NA**   |         |         |

\* Mixed (MHGP) lesion as the main HGP was lower than 75% threshold

\*\* Mixed (MHGP) lesion from which the relative contribution of desmoplastic vs replacement feature could not be ascribed

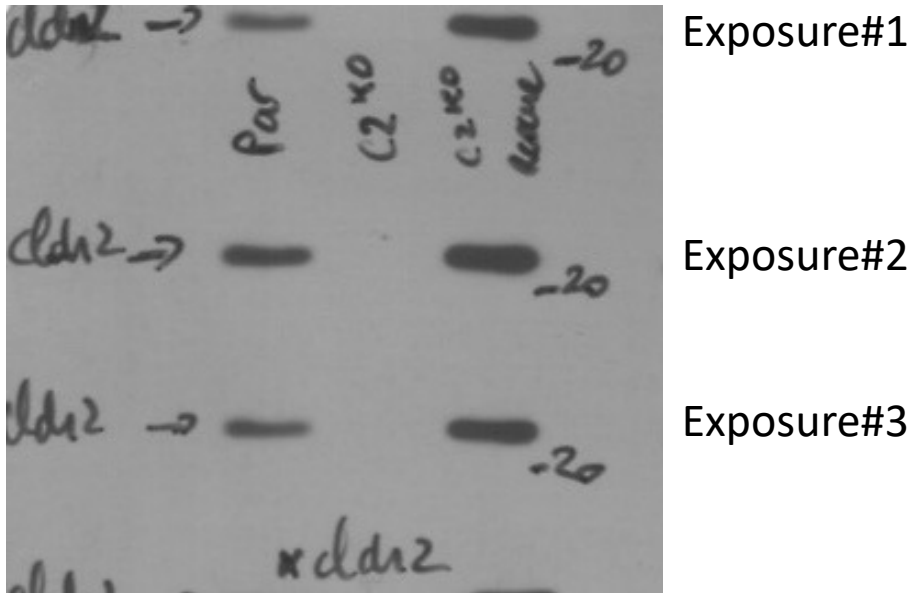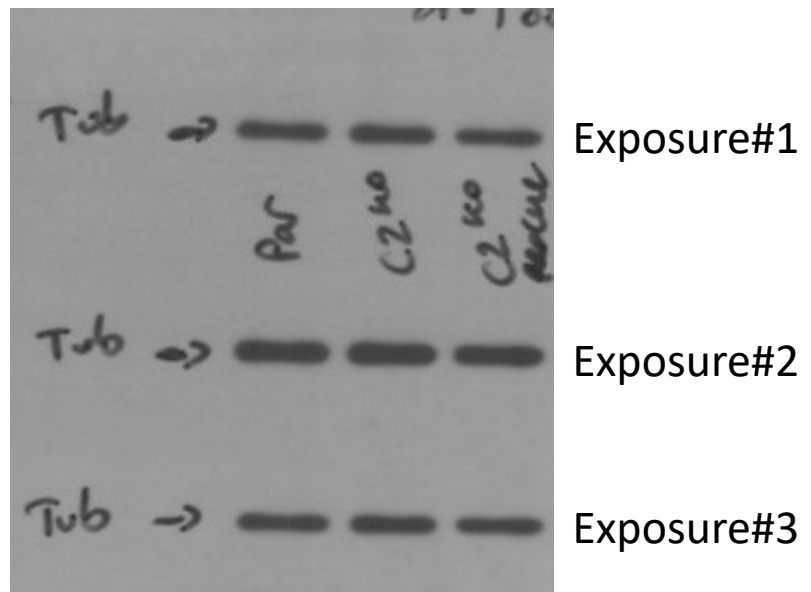

Supplementary Figure 11 (Figure 1)



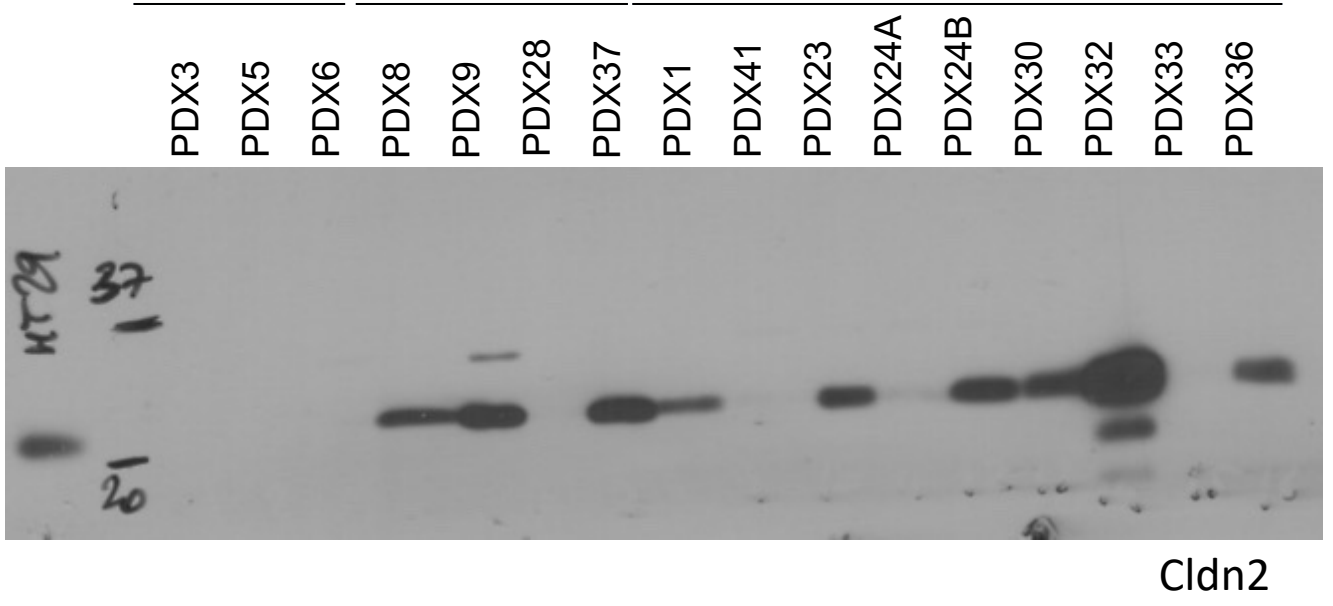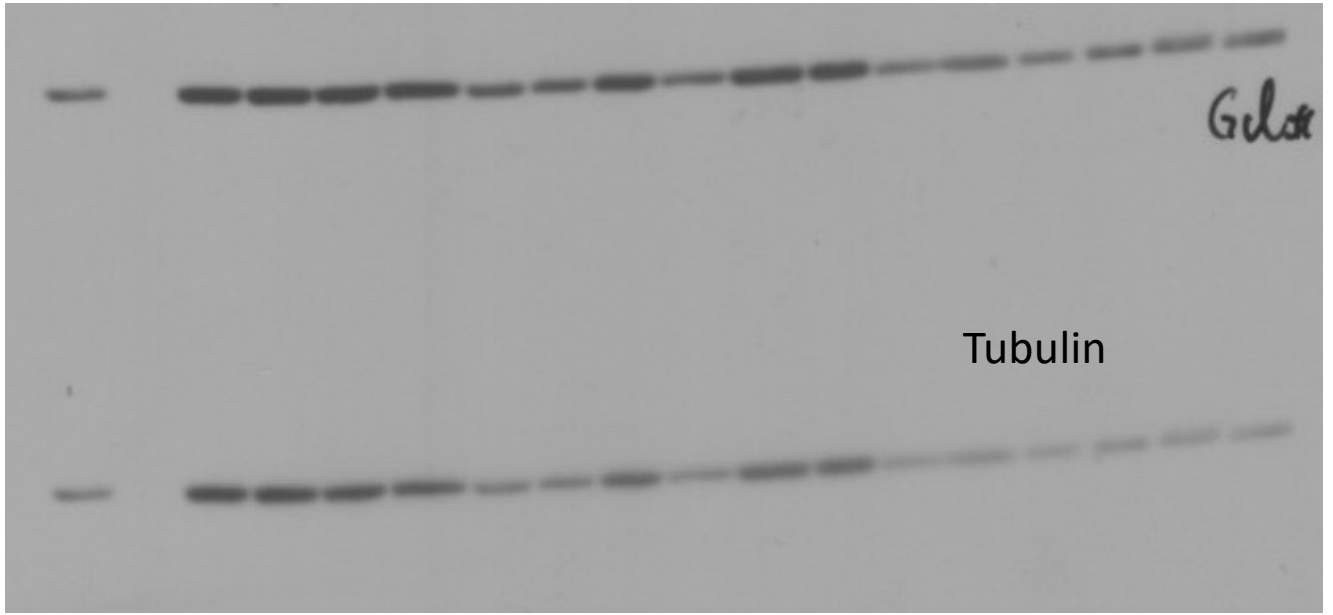

Supplementary Figure 11 (Figure 4)

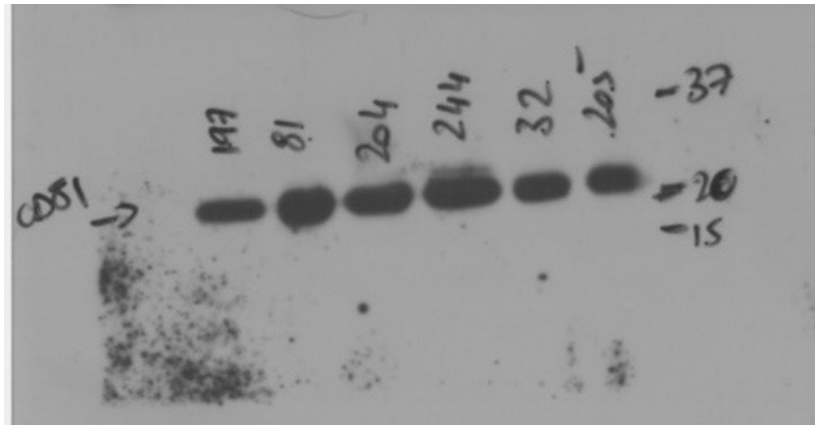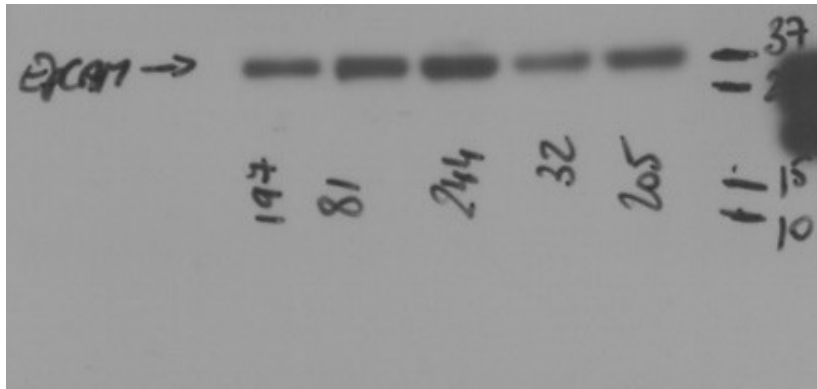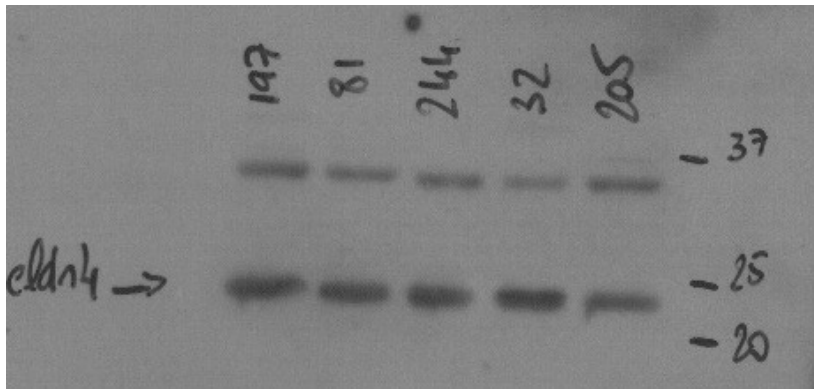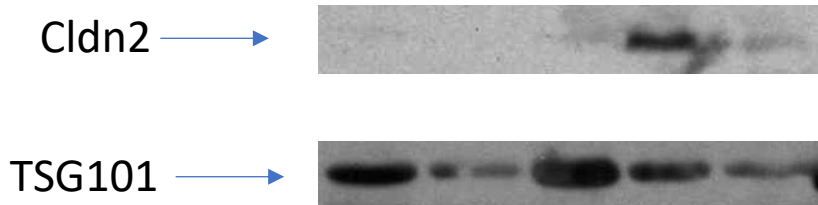

Supplementary Figure 11 (Figure 6)

20 -

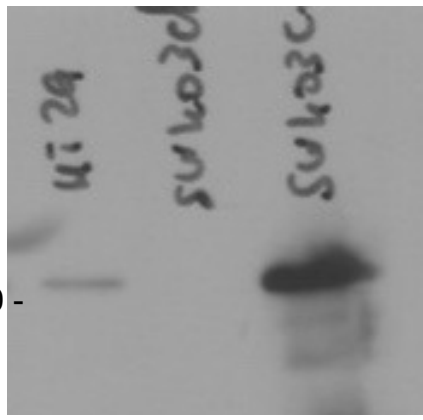

Exposure#1

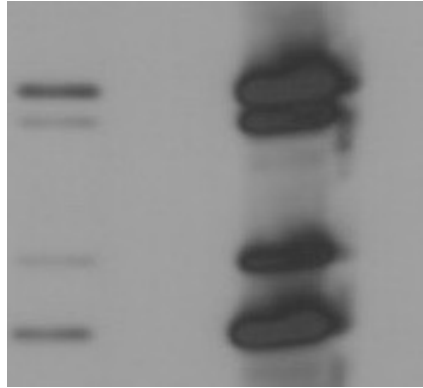

Exposure#2

Exposure#3

Exposure#4

Exposure#5

Cldn2

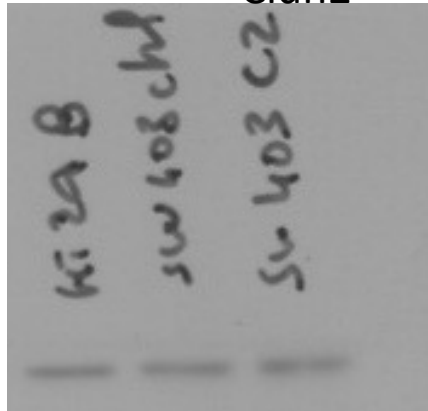

Exposure#1

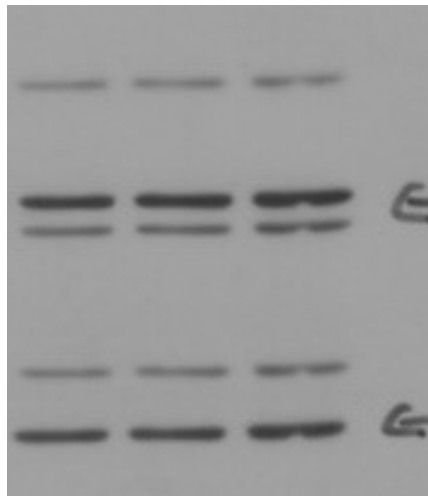

Exposure#2

Exposure#3

Exposure#4

Exposure#5

Exposure#6

50 -

Tubulin

Supplementary Figure 11 (Figure S2)

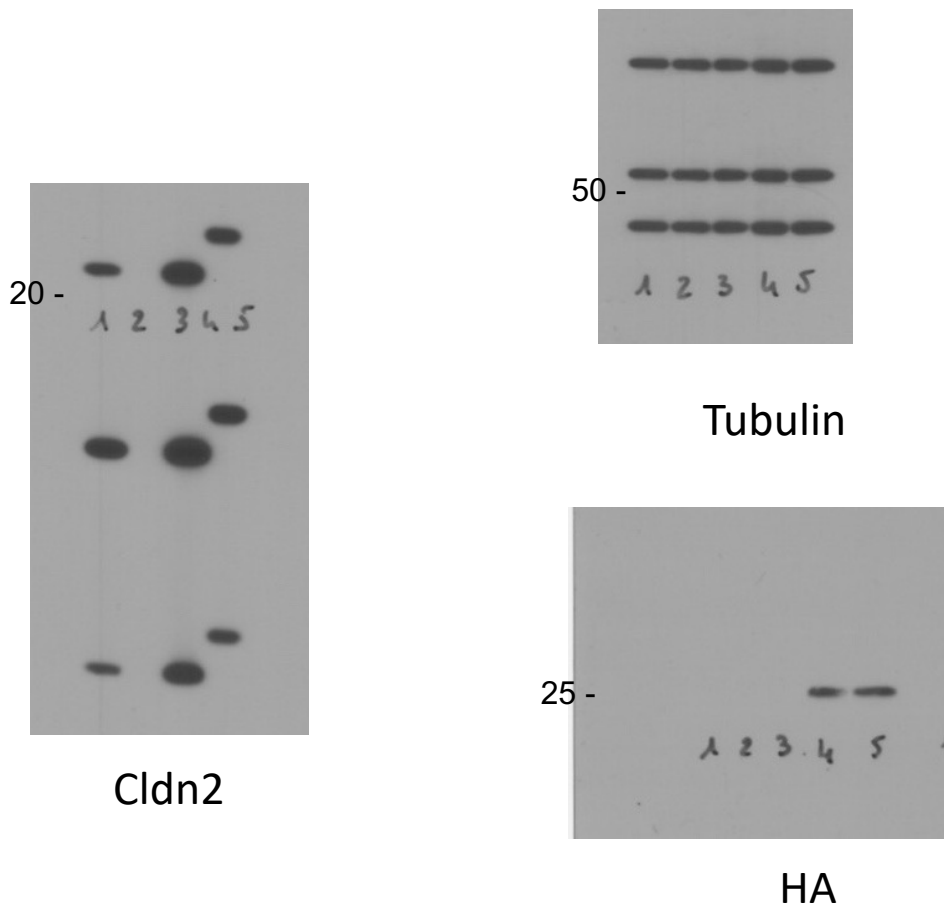

- 1: HT29 parental
- 2: HT29: Cldn2<sup>KO</sup>:EV
- 3: HT29: Cldn2<sup>KO</sup>:WT
- 4: HT29: Cldn2<sup>KO</sup>:WT (HA)
- 5: HT29: Cldn2<sup>KO</sup>: $\Delta$ PDZ (HA)

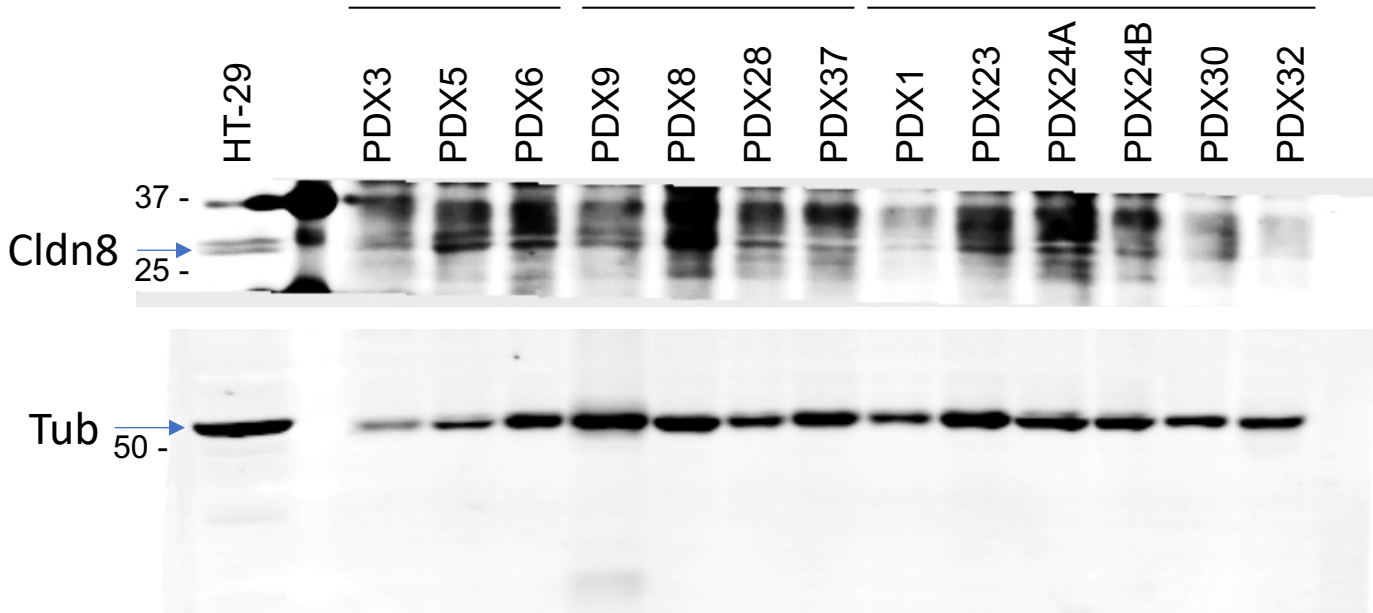

Supplementary Figure 11 (Figure S9)
