# Supplementary material for: Claudin-2 promotes colorectal cancer liver metastasis and is a biomarker of the replacement type growth pattern
Source: PubMed Central journal article supplement (PMC8172859; doi:10.1038/s42003-021-02189-9), 2021-06-02
Supplement: 42003_2021_2189_MOESM2_ESM.pdf [file 42003_2021_2189_MOESM2_ESM.pdf]

## **Description of Additional Supplementary Files**

**File name:** Supplementary Data 1

**Description:** Source data for Figures.
